# Constitutively Active Androgen Receptor Variants Upregulate Expression of Mesenchymal Markers in Prostate Cancer Cells

Félicie Cottard<sup>1</sup>, Irène Asmane<sup>1,2</sup>, Eva Erdmann<sup>1</sup>, Jean-Pierre Bergerat<sup>1,2</sup>, Jean-Emmanuel Kurtz<sup>1,2</sup>, Jocelyn Céraline<sup>1,2\*</sup>

<sup>1</sup> INSERM U1113, Fédération de Médecine Translationnelle de Strasbourg (FMTS), Université de Strasbourg, Strasbourg, France, <sup>2</sup> CHRU Strasbourg, Hematology and Oncology Unit, Strasbourg, France

## Abstract

Androgen receptor (AR) signaling pathway remains the foremost target of novel therapeutics for castration-resistant prostate cancer (CRPC). However, the expression of constitutively active AR variants lacking the carboxy-terminal region in CRPC may lead to therapy inefficacy. These AR variants are supposed to support PCa cell growth in an androgen-depleted environment, but their mode of action still remains unresolved. Moreover, recent studies indicate that constitutively active AR variants are expressed in primary prostate tumors and may contribute to tumor progression. The aim of this study was to investigate the impact of constitutively active AR variants on the expression of tumor progression markers. N-cadherin expression was analyzed in LNCaP cells overexpressing the wild type AR or a constitutively active AR variant by qRT-PCR, Western blot and immunofluorescence. We showed here for the first time that N-cadherin expression was increased in the presence of constitutively active AR variants. These results were confirmed in C4-2B cells overexpressing these AR variants. Although N-cadherin expression is often associated with a downregulation of E-cadherin, this phenomenon was not observed in our model. Nevertheless, in addition to the increased expression of N-cadherin, an upregulation of other mesenchymal markers expression such as *VIMENTIN*, *SNAIL* and *ZEB1* was observed in the presence of constitutively active variants. In conclusion, our findings highlight novel consequences of constitutively active AR variants on the regulation of mesenchymal markers in prostate cancer.

**Citation:** Cottard F, Asmane I, Erdmann E, Bergerat J-P, Kurtz J-E, et al. (2013) Constitutively Active Androgen Receptor Variants Upregulate Expression of Mesenchymal Markers in Prostate Cancer Cells. PLoS ONE 8(5): e63466. doi:10.1371/journal.pone.0063466

**Editor:** Zoran Culig, Innsbruck Medical University, Austria

**Received:** January 9, 2013; **Accepted:** April 2, 2013; **Published:** May 2, 2013

**Copyright:** © 2013 Cottard et al. This is an open-access article distributed under the terms of the Creative Commons Attribution License, which permits unrestricted use, distribution, and reproduction in any medium, provided the original author and source are credited.

**Funding:** This work was supported by the University of Strasbourg; the Ligue Contre le Cancer, the Alsace Contre le Cancer; and the Association pour la Recherche sur les Tumeurs Prostatiques (ARTP). The funders had no role in study design, data collection and analysis, decision to publish, or preparation of the manuscript.

**Competing Interests:** The authors have declared that no competing interests exist.

\* E-mail: ceraline@unistra.fr

## Introduction

Prostate cancer (PCa) is the most common cancer in men over 50 years of age and the second cause of male mortality due to cancer in Europe. Androgens signaling plays a key role in PCa cells proliferation or survival [1], and androgen withdrawal remains the main treatment for local recurrence and androgen-dependent metastatic PCa. However, the benefit of this therapy is transient and all tumors ultimately recur as castration-resistant PCa (CRPC).

Genetic and splicing events affecting the androgen receptor (AR) gene have been linked to CRPC. Constitutively active AR variants, lacking the carboxy-terminal region that encompasses the ligand binding domain and the activation function 2, might contribute to the progression of PCa into castration resistance. These constitutively active AR variants result from premature stop codons due to nonsense mutations as reported for the ARQ640X [2,3,4,5] or from alternative splicing with the retention of a cryptic exonic sequence as described for AR-V7 [4,6,7,8,9,10].

The role of constitutively active AR variants in CRPC has been shown in many studies [7,8,11,12]. The expression of these truncated AR variants is increased by a 20-fold in CRPC

compared with localized PCa [9], and is correlated with the capacity of PCa cells to grow *in vitro* and *in vivo* in the absence of androgen [7]. However, the exact molecular mechanisms leading to their activation and their mode of action in PCa and CRPC remain unclear.

Recent studies suggest that constitutively active AR variants could play a role in tumor progression. Indeed, although these constitutively active AR variants are already expressed in primary prostate tumors, their expression is all the more expressed in bone metastasis [8]. Furthermore, their expression is associated with an increase of NFAT (Nuclear factor of activated T-cell) and AP-1 (Activator Protein-1) activity, two transcription factors involved in cell proliferation, migration and survival [13].

N-cadherin, which belongs to cadherin superfamily, is located at adherens junctions in nervous, endothelial or mesenchymal cells and is involved in tumor progression [14,15]. Indeed, N-cadherin expression is increased in most cancers and promotes tumor cells migration, invasion and survival [14]. Increased N-cadherin expression is also associated with epithelial-mesenchymal transition (EMT), a phenomenon characterized by a decrease of epithelial markers such as E-cadherin and an increase of

mesenchymal markers such as Vimentin or N-cadherin [16,17,18,19]. These molecular and cellular modifications play an important role in tumor cells dissemination at secondary sites [20,21].

More recently, studies have shown that castration-resistant PCa is associated with an upregulation of N-cadherin expression in cellular models as well as PCa xenografts and clinical samples of CRPC [22,23,24]. Moreover, monoclonal antibodies against N-cadherin have been shown to delay the emergence of castration resistance and to reduce the growth of CRPC xenografts [23]. Taken together, these data show that there is a correlation between N-cadherin expression and resistance to castration. Nevertheless, molecular mechanisms whereby N-cadherin expression is increased in CRPC remain unknown.

The aim of this work was to show a possible link between the presence of constitutively active AR variants and the expression of tumor progression markers. More particularly, we focused on the impact of constitutively active AR variants on the expression of N-cadherin and other mesenchymal markers. In the present study, we have shown that *N-CADHERIN* as well as *VIMENTIN*, *SNAIL* and *ZEI1* are upregulated in the presence of constitutively active AR variants in PCa.

## Materials and Methods

### Cell culture

The human prostate carcinoma LNCaP cell line, clone FGC and the 22Rv1 cell line (ECACC, Salisbury, United Kingdom) was maintained in RPMI-1640 complete medium containing 10% fetal calf serum (FCS), 10 mM HEPES, 2 mM L-glutamine, 100 U/mL penicillin, 100 µg/mL streptomycin (Sigma-Aldrich, France) and 1mM sodium pyruvate (Invitrogen, Fisher Scientific, France).

C4-2B cell line (ViroMed Laboratories, Minnetonka, MN, USA) was maintained in DMEM medium supplemented with 20% Ham's F12, 10% FCS, 100 U/mL penicillin, 100 µg/mL streptomycin, 5 µg/mL insulin, 13.65 pg/mL triiodo-thyronine, 4.4 µg/mL apo-transferrin human, 0.244 µg/mL d-biotin and 12.5 µg/mL adenine (Sigma-Aldrich, France).

### Plasmids and transfection

For immunofluorescence experiments, the wild type androgen receptor (AR) (AR-WT) and the constitutively active AR Q640X and AR Q670X [25] variants were linked to EGFP as previously described [2,3]. For gene expression analysis and Western-blot, pE-ARWT, pE-ARQ640X and pE-AR-V7 plasmids were constructed by inserting the corresponding AR cDNA between the *NheI* and *BamHI* sites in pEGFP-C3.

For transfections, the JetPEI<sup>TM</sup> transfection reagent (Polyplus Transfection, Ozyme, France) was used according to the manufacturer's protocol. LNCaP cells were seeded in 10 cm dishes at  $1 \times 10^6$  cells/dish or in 6-wells plate at  $2 \times 10^5$ /well. Three days later, the medium was changed and cells were transfected with 10 µg of the indicated plasmid using 20 µl of JetPEI transfection reagent for 10 cm dishes or with 3 µg of plasmid using 6 µl of JetPEI for 6-wells plate. Medium was changed 48 h after and cells were incubated up to 9 days according to the experiments. The medium was changed every two days and for incubations beyond 4 post-transfection days, cells were incubated in the presence of 400 µg/mL geneticin (Invitrogen, France).

### Impact of androgens on N-cadherin expression

LNCaP cells were seeded in 6-wells plate in complete medium and transfected as previously described. Twenty four hours later,

medium was changed to phenol red free RPMI-1640 supplemented with 5% dextran-coated charcoal-stripped FCS (DCC-FCS) and with the indicated concentration of dihydrotestosterone (DHT) (Sigma-Aldrich, France) or vehicle (ethanol).

For experiment with MDV3100, transfected LNCaP cells were incubated in RPMI-1640 supplemented with 5% DCC-FCS containing the indicated DHT dose and 100 nM MDV3100 (Enzalutamide, Selleck Chemicals, Euromedex, France) or vehicle (dimethyl sulfoxide, DMSO). To confirm the effects of androgens on N-cadherin expression, 22Rv1 cells were grown in RPMI-1640 with 100 nM or 1 µM MDV3100, or DMSO.

### Cell Sorting

LNCaP cells were seeded in 10cm dishes at  $1 \times 10^6$  cells/dish and were transfected with pEGFP-ARWT or pEGFP-ARQ640X. Four days after transfection, cells were trypsinized and sorted thanks to the green fluorescence (EGFP) with a BD FACSAria-II cell sorter (BD Biosciences, Le Pont de Claix, France). Total RNA was extracted from EGFP negative (non-transfected) and EGFP positive (transfected) cells and was used to analyze gene expression by qRT-PCR.

### Quantitative real-time PCR

Total cellular RNA was extracted from cell lines using NucleoSpin<sup>®</sup> RNA II assay (Macherey-Nagel, France) according to the manufacturer's procedure. RNA concentrations and purity were quantified measuring the absorbance at 260 nm and 280 nm (GeneQuant pro, GE Healthcare, France). The reverse transcription was performed from 400 ng or 1 µg RNA using RT Omniscript assay (Qiagen, Courtaboeuf, France). RNA were diluted into 13 µL and denatured at 65°C during 5 minutes. A 7 µL reaction mix containing 1×RT template, 0.5 mM of each dNTP, 1 µM oligo dT, 10U RNase inhibitor and 4U Omniscript Reverse Transcriptase was added and the reaction was incubated 1 h at 37°C. The reaction was stopped by heating to 93°C for 5 minutes. *N-CADHERIN*, *E-CADHERIN*, *VIMENTIN*, *SNAIL*, *TWIST1*, and *ZEI1* mRNA levels were quantified using real-time PCR with LightCycler 480 (Roche Applied Science, Meylan, France). For PCR reactions, 5 µL LightCycler<sup>®</sup> 480 SYBR Green I Master (Roche, Molecular Diagnostics, Mannheim, Germany) and 1 µL specific primers (Table 1) (Qiagen, QuantiTect Primers, Courtaboeuf, France) were mixed with 4 µL of 1:5 cDNA dilution. Results were normalized using housekeeping gene *β-ACTIN* or *PBGD* (Porphobilinogen deaminase) (Qiagen, QuantiTect Primer). Amplification specificity was verified by analyzing melting curve and by electrophoresis migration. All experiments were realized in triplicate and repeated 3 times. Relative quantification was used to determinate fold change in expression level by the  $\Delta\Delta C_t$  method. Each value is expressed as the mean  $\Delta\Delta C_t \pm$  SEM. Results were analyzed with Student t test and *p*-value <0.05 was considered significant.

### Western Blot

Cells were lysed in buffer containing 10 mM Tris-HCl pH7, 140 mM NaCl, 3 mM MgCl<sub>2</sub>, 0.5×Igepal, 5 mM DTT, 1× phosphatase inhibitor, and 1× protease inhibitor. Protein concentration for each sample was quantified using BCA Protein Assay (Pierce Biotechnology, Inc., Rockford, IL, USA) according to the manufacturer's procedure. A quantity of 15 µg to 100 µg of total proteins was loaded on 7.5% SDS-PAGE. After migration and transfer to nitrocellulose membrane, membranes were saturated with PBS/0.1%Tween/2%ECL and incubated at 4°C overnight with 0.1 µg/mL mouse monoclonal anti N-cadherin (catalog no. 610920, BD Biosciences, France) or 1 µg/mL mouse

**Table 1.** List of primers used in qRT-PCR experiments.

| Genbank                  | QuantiTect reference | Hybridization temperature (°C) | Amplicon length (bp) | Amplified exons |
|--------------------------|----------------------|--------------------------------|----------------------|-----------------|
| <i>β-ACTIN (ACTB)</i>    | QT01680476           | 55/60                          | 104                  | NA              |
| <i>E-CADHERIN (CDH1)</i> | QT00080143           | 55                             | 84                   | 5/6             |
| <i>N-CADHERIN (CDH2)</i> | QT00063196           | 60                             | 102                  | 14/15           |
| <i>PBGD (HMBS)</i>       | QT00014462           | 55                             | 107                  | 7/8/9           |
| <i>TWIST1</i>            | QT00011956           | 55                             | 127                  | 1/2             |
| <i>SNAIL (SNAI1)</i>     | QT00010010           | 60                             | 131                  | 2/3             |
| <i>VIMENTIN</i>          | QT00095795           | 60                             | 94                   | 2/3             |
| <i>ZEB1</i>              | QT01888446           | 58                             | 105                  | 2/3/4           |

doi:10.1371/journal.pone.0063466.t001

monoclonal anti AR (catalog no. 554225, BD Biosciences, France) antibody.  $\beta$ -actin (0.2  $\mu$ g/mL) (catalog no. sc-47778, Tebu-bio, France) was used as internal control. After washes, immunocomplexes were detected with 0.2  $\mu$ g/mL HRP-conjugated goat anti mouse (catalog no. sc-2005, Tebu-bio, France), or 0.5  $\mu$ g/mL rat anti mouse IgG2a secondary antibodies (catalog no. 553391, BD Biosciences, France), and finally revealed by chemiluminescence (Immobilon<sup>TM</sup> Western, Millipore, Molsheim, France).

### Immunofluorescence Staining

Lab-Tek II chamber slides (2 wells) were coated with LNCaP medium for two hours and  $1 \times 10^5$  LNCaP cells/well were seeded. LNCaP cells were transfected with 2  $\mu$ g of pEGFP-WT, pEGFP-ARQ640X or pEGFP-ARQ670X 3 days later and incubated for 4 days. LNCaP cells were rinsed in PBS and fixed with 2% paraformaldehyde. Cells were blocked and permeabilized by 0.1% Triton/1% Bovine Serum Albumin (BSA)/PBS for 30 min at room temperature. Cultures were incubated with 2.5  $\mu$ g/mL anti N-cadherin mouse monoclonal antibody (catalog no. 610920, BD Biosciences, France) or isotypic antibody (Sigma-Aldrich, Saint-Quentin Fallavier, France) at 4°C overnight. After washing in PBS, LNCaP cells were incubated with 2  $\mu$ g/mL Alexa Fluor 568-conjugated goat anti mouse (Invitrogen, Fisher Scientific, France) for 1 h and nuclei were stained with 0.1  $\mu$ g/mL DAPI solution for 20 min at 30°C. Images were captured with the Leica LAS AF6000 fluorescence microscope using LAS AF software (Leica).

## Results

### Constitutively active androgen receptor variants upregulate N-cadherin expression in prostate cancer cells

Constitutively active AR variants have been associated with CRPC. Moreover, some studies showed that CRPC is also associated with an upregulation of N-cadherin expression [22,23]. We investigated whether constitutively active AR variants upregulate N-cadherin expression in PCa cells. *N-CADHERIN* mRNA level was determined by qRT-PCR in LNCaP cells overexpressing the constitutively active AR Q640X or AR-V7, or the AR-WT as control (Figure 1). *N-CADHERIN* expression remained unchanged in LNCaP cells overexpressing AR-WT compared with controls. Interestingly, *N-CADHERIN* expression was increased by a 8,000-fold in the presence of ARQ640X and AR-V7 (Figure 1A-B). These data were confirmed in C4-2B cells (Figure S1) and at the protein level in LNCaP cells (Figure 1C). In addition, a time course experiment revealed that N-cadherin

protein levels were consistently increased from day-3 after LNCaP cells transfection with ARQ640X (Figure 1D).

To confirm these data from transient transfection, a cell-sorting analysis was performed after LNCaP transfection to demonstrate that N-cadherin expression was restricted to cells expressing a constitutively active AR. *N-CADHERIN* expression was analyzed in EGFP negative (non-transfected cells) or EGFP positive (transfected cells) fractions by qRT-PCR. Consistent with above results, *N-CADHERIN* expression was undetectable in both EGFP-negative and positive fractions following LNCaP transfection with pEGFP-ARWT. However, upon transfection with pEGFP-ARQ640X, *N-CADHERIN* expression was increased in EGFP positive cells overexpressing the constitutively active AR, but not in the EGFP negative fraction (Figures 2A–B). These results were further confirmed by immunofluorescence analysis showing an N-cadherin labeling exclusively in EGFP positive cells expressing a constitutively active AR variant (Figure 2C).

Taken together, these data strongly suggest that constitutively active AR variants upregulate N-cadherin expression in PCa cells.

### Androgens negatively regulate N-cadherin expression induced by constitutively active androgen receptor variants

A recent study reported that constitutively active AR variants might require a full-length AR (AR-FL) to activate endogenous target genes. To explore the effect of the endogenous AR-FL present in LNCaP cells on the ability of constitutively active AR variants to induce N-cadherin expression, LNCaP cells overexpressing AR-WT or a constitutively androgen variant were incubated in the presence of 100 nM DHT or vehicle, and N-cadherin expression was analyzed by qRT-PCR. In accordance with our previous results, no N-cadherin expression was observed in cells overexpressing AR-WT. Interestingly, a 1.4-fold decrease in N-cadherin expression level was observed when cells overexpressing AR Q640X or AR-V7 were cultured in the presence of 100 nM DHT compared to vehicle (Figure 3A). In addition, this androgen-mediated N-cadherin repression was dose-dependent (Figure 3B). These results suggest that constitutively active androgen receptor variants do not require AR-FL to up-regulate N-cadherin expression. However, DHT-activated AR-FL seems to antagonize effects of constitutively active androgen receptor variants on N-cadherin expression (Figure 3C). To verify this hypothesis, the novel anti-androgen MDV3100 was used to inhibit DHT-activated AR-FL in transfected LNCaP cells. As expected, a further significant increase of N-cadherin expression was observed in LNCaP cells overexpressing AR variants in the presence of

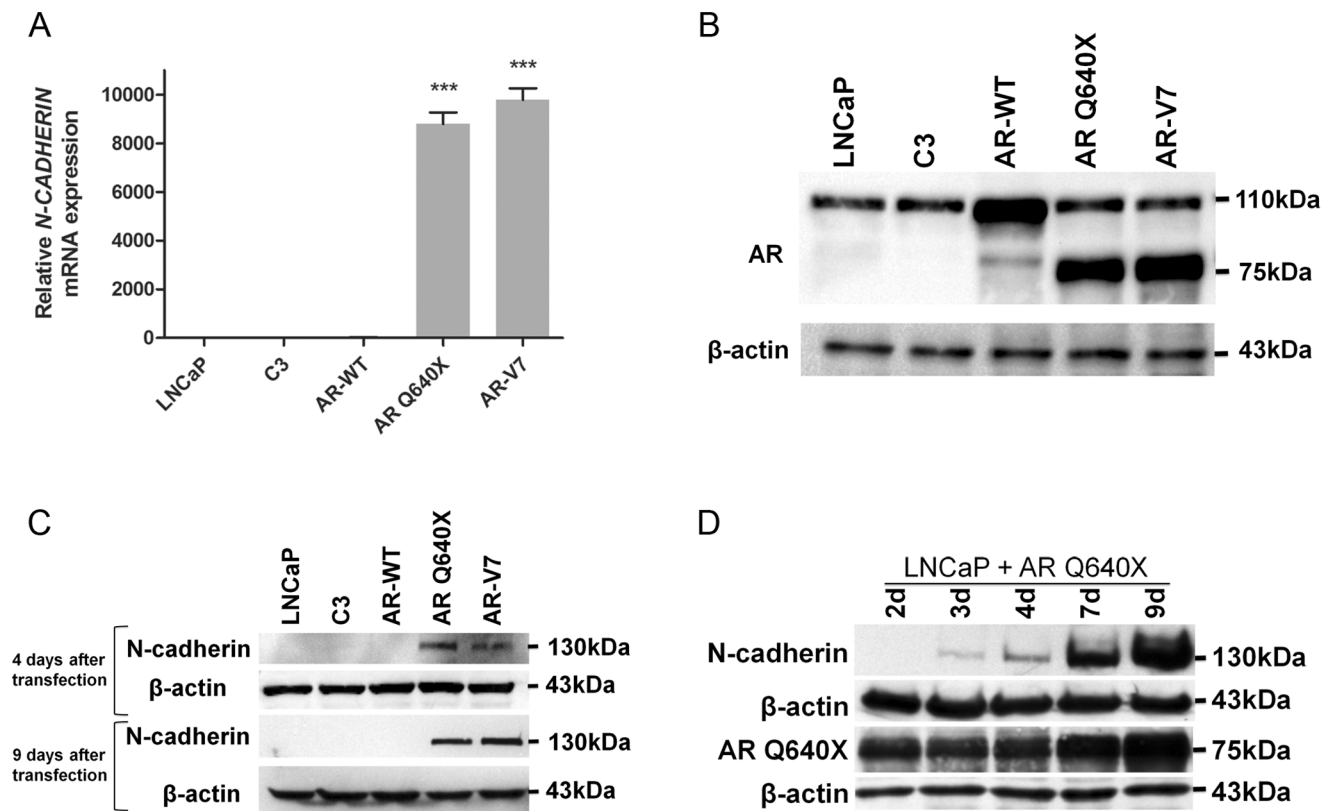

**Figure 1. N-cadherin expression is upregulated in the presence of constitutively active androgen receptor variants.** A). N-cadherin expression was assessed by qRT-PCR in LNCaP cells overexpressing the constitutively active AR Q640X or AR-V7, or the AR-WT and in cells transfected with the empty plasmid (C3). Cells were grown in complete medium for 9 days after transfection. Parental LNCaP cells were used as control. y-Axis represents the relative fold change compared with control (parental LNCaP cells).  $\beta$ -ACTIN was used as the endogenous normalization control. Relative expression is presented as the mean  $\pm$  SEM from three independent experiments. Each sample is compared one by one by two tail unpaired t test. NS: Not significant \*  $P < 0.05$ , \*\*  $P < 0.01$  and \*\*\*  $P < 0.001$ . B). Western Blot showing AR expression in transfected and non transfected LNCaP cells. C). Immunoblot analysis of N-cadherin expression in transfected LNCaP cells 4 and 9 days after transfection. D). Kinetic analysis of N-cadherin expression by Western Blot in LNCaP cells overexpressing AR Q640X from 2 to 9 days after transfection.  $\beta$ -actin was used as loading control. doi:10.1371/journal.pone.0063466.g001

100 nM MDV3100 (Figure 3D). These results were also confirmed in castration-resistant 22Rv1 cells, known to express both AR-FL and constitutively active AR variants. A 2-fold increase in N-cadherin mRNA level was observed when 22Rv1 cells were cultured for 4 days in the presence 100 nM and 1  $\mu$ M of the anti-androgen MDV3100 (Figure S2).

All together, these data suggest that DHT-activated AR-FL could compete with constitutively active androgen receptor for regulating N-cadherin expression.

### Constitutively active androgen receptor variants are associated with the expression of mesenchymal markers

It is widely known that in tumor cells, the expression of mesenchymal markers is associated with a down-regulation of epithelial markers. We hypothesized that the upregulation of N-cadherin expression observed in the presence of constitutively active AR variants is accompanied by a decreased expression of E-cadherin. To test this hypothesis, we analyzed E-cadherin expression in LNCaP transfected with ARQ640X, AR-V7 or the wild type AR expression plasmid, or the empty plasmid as control. *E-CADHERIN* mRNA levels in LNCaP cells upon transfection with ARQ640X or AR-V7 expression plasmid did not show any significant difference compared with controls (Figure 4A). These results were further confirmed by Western

blot analysis (data not shown), suggesting that the expression of constitutively active AR variants in PCa is associated with a marked increase in N-cadherin expression, but is not correlated with a down-regulation of E-cadherin.

We also investigated whether constitutively active AR expression in PCa cells is associated with other mesenchymal markers. Expression levels of *VIMENTIN* and transcription factors *TWIST1*, *ZEB1* and *SNAIL* were determined by qRT-PCR at day-9 after LNCaP cells transfection with ARQ640X or AR-V7 expression plasmid, the wild type AR plasmid or the empty vector as controls (Figure 4B–E). *VIMENTIN* expression was increased by a 2.5 and 1.5-fold in LNCaP cells overexpressing ARQ640X and AR-V7 when compared with controls respectively (Figure 4B).

Although Twist1 is known to induce *N-CADHERIN* expression in PCa, no significant difference in the mRNA levels of *TWIST1* was observed (Figure 4C). However, constitutively active AR variants led to a statistically significant increase of *SNAIL* and *ZEB1* mRNA levels (Figure 4D, E). *ZEB1* upregulation was also confirmed at the protein level (Figure 4F).

### Discussion

The AR signaling is very important for proliferation and survival of prostate cancer cells. The AR pathway remains activated during the progression of PCa towards a castration-

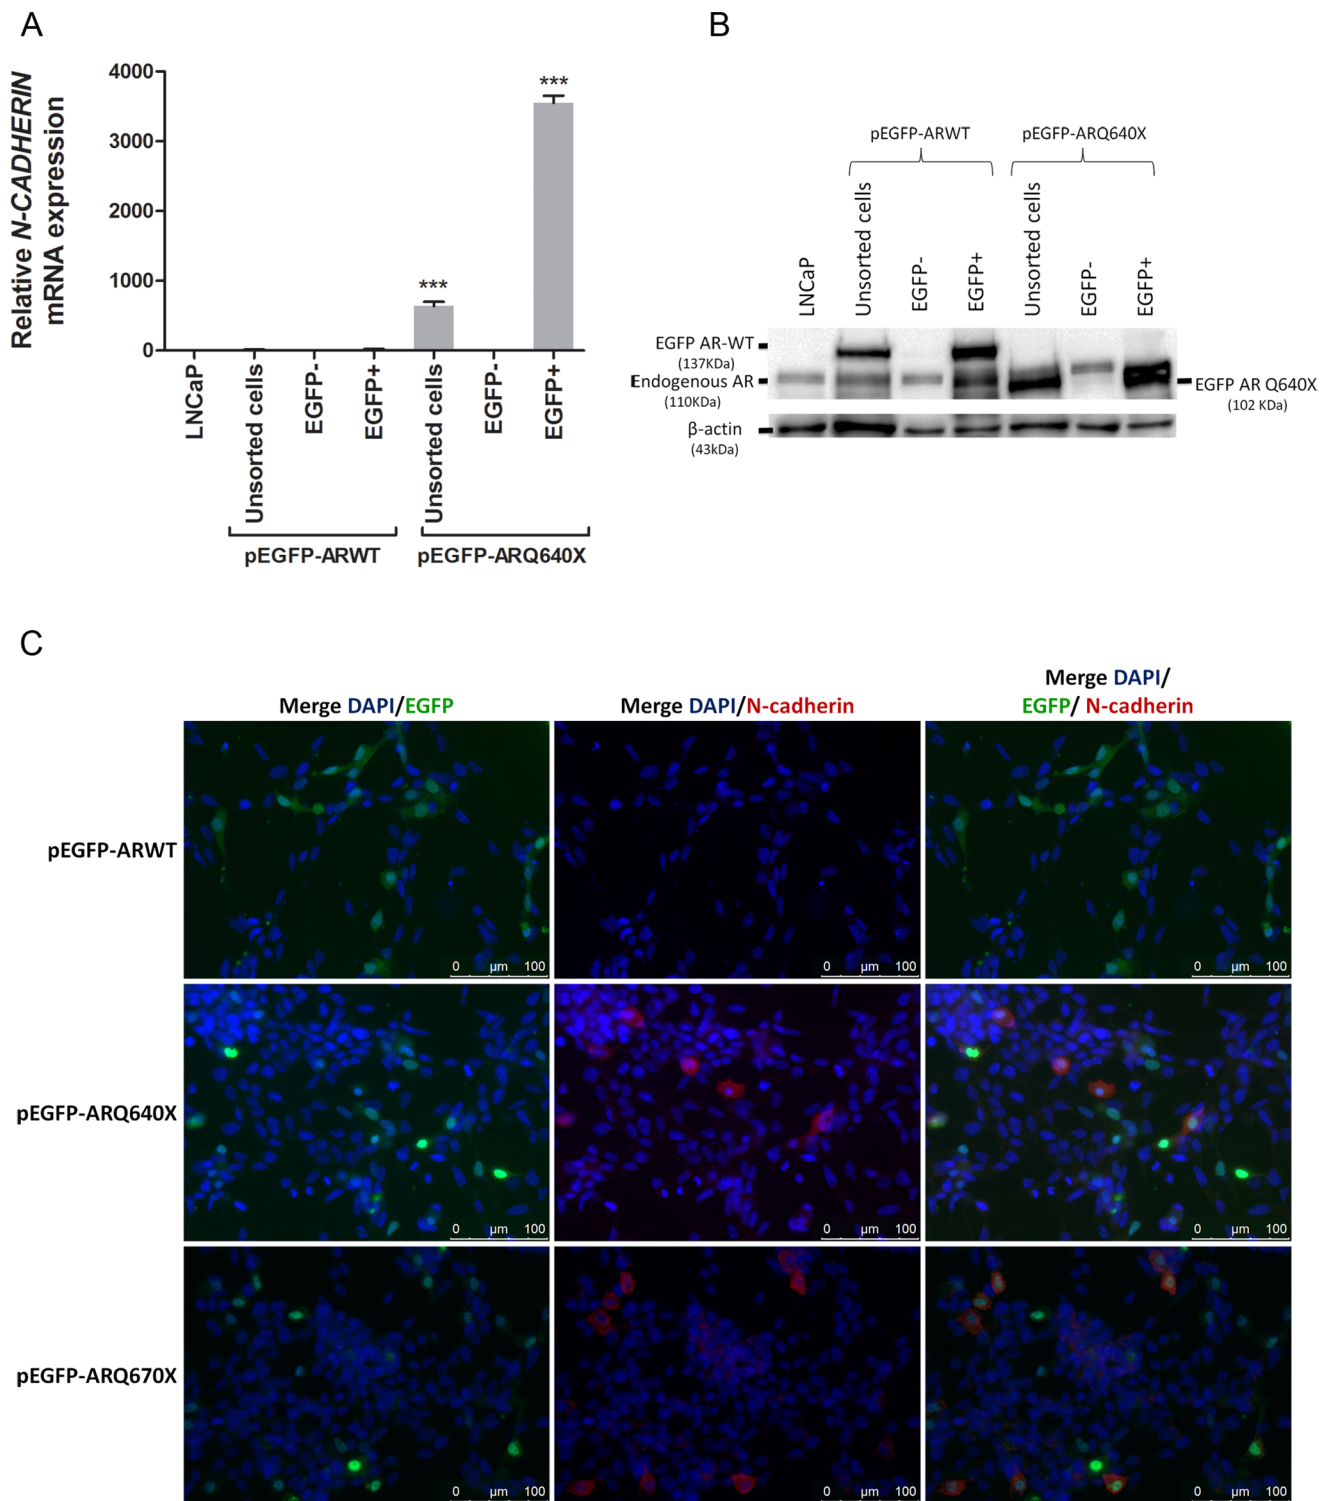

**Figure 2. N-cadherin upregulation was restricted to LNCaP cells expressing constitutively active androgen receptor variants.** LNCaP cells were transiently transfected with pEGFP-ARWT or pEGFP-ARQ640X plasmid and were sorted 4 days after. A). *N-CADHERIN* expression was analyzed by qRT-PCR in EGFP positive (transfected) and EGFP negative (non-transfected) fractions. B). Androgen receptor (AR) level was analyzed by Western Blot to verify the purity of each fraction after cell sorting. C). Immunofluorescence analysis of N-cadherin (red fluorescence) expression in LNCaP cells transfected with EGFP-tagged (green fluorescence) AR-WT, AR Q640X or AR Q670X expression plasmid. Magnification:  $\times 20$ . doi:10.1371/journal.pone.0063466.g002

resistant disease and the emergence of constitutively active AR variants lacking the ligand-binding domain is now considered as a major event in CRPC. In spite of some studies suggest that

constitutively active AR variants have an impact on tumor progression, their function remains so far unresolved.

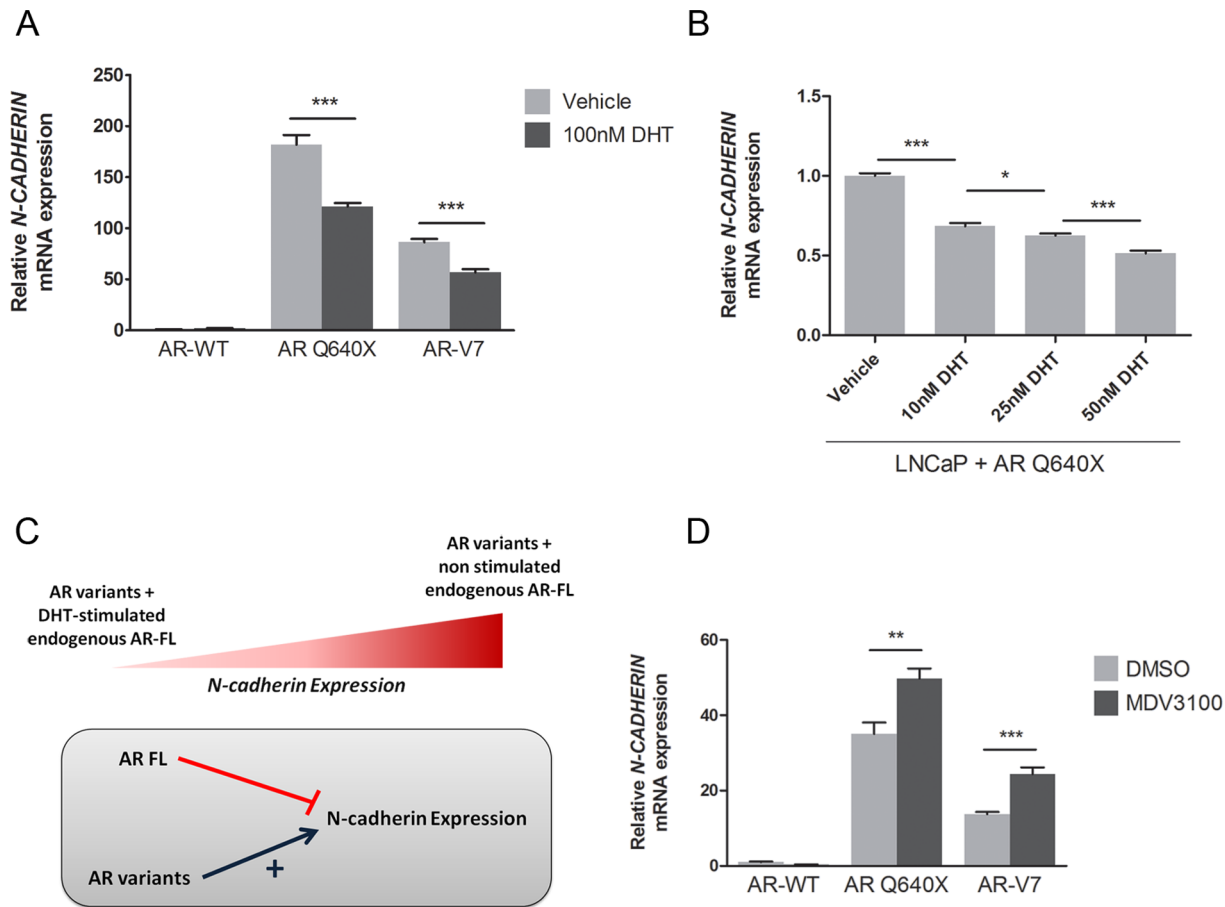

**Figure 3. Androgens abrogate N-cadherin upregulation induced by constitutively active androgen receptor variants in LNCaP cells.**

A). LNCaP cells were grown in RPMI-1640 containing 5% DCC-FCS and 100 nM of DHT or vehicle (EtOH). N-cadherin expression was analyzed by qRT-PCR in LNCaP cells 4 days after transfection with AR-WT or the constitutively active AR Q640X or AR-V7 expression plasmid. B). N-cadherin expression level in LNCaP cells was investigated by qRT-PCR 4 days after transfection with AR Q640X expression plasmid in the presence of different DHT concentrations (10 nM, 25 nM and 50 nM) or vehicle. C). N-cadherin expression induced by constitutively active AR variants (AR variants) was negatively regulated when LNCaP cells were grown in the presence of DHT. We hypothesize that endogenous AR-FL present in LNCaP cells and AR variants could act differently. In this model, DHT-stimulated endogenous AR-FL represses N-cadherin expression whereas AR variants upregulate its expression. D). LNCaP cells overexpressing AR-WT, AR Q640X and AR-V7 were cultured in DCC-FCS medium supplemented with 100 nM of DHT and in the presence of 100 nM of MDV3100 or DMSO as control during 3 days. N-cadherin expression was analyzed by qRT-PCR 4 days after transfection, and was normalized to  $\beta$ -ACTIN. The  $\Delta\Delta$ Ct method was used to calculate relative expression and each value was reported as the mean of  $\Delta\Delta$ Ct  $\pm$  SEM. NS: Not Significant \*  $P < 0.05$ , \*\* $P < 0.01$  and \*\*\* $P < 0.001$ . doi:10.1371/journal.pone.0063466.g003

In this study, we have shown that N-cadherin is upregulated in LNCaP cells expressing constitutively active AR variants, but not in LNCaP cells overexpressing a full-length AR. These data suggest for the first time that constitutively active AR variants can induce N-cadherin expression. This finding should be connected to recent studies reporting a correlation between CRPC and N-cadherin upregulation [22,23,24]. Consistent with these studies, our data suggest that constitutively active AR variants signaling could be a mechanism leading to N-cadherin expression in CRPC.

These findings again highlight the link between AR signaling pathway and N-cadherin expression. Recent studies suggest that AR negatively regulates N-cadherin expression [22,23]. Indeed, N-cadherin upregulation is associated with a decreased expression of AR in castration-resistant PCa xenografts [23]. Furthermore, the upregulation of N-cadherin observed in the castration-resistant LNCaP-19 cells can be reversed in the presence of androgens [22,26,27]. In accordance with these data, we have shown that androgens were associated with a decreased N-cadherin expression in our model overexpressing a constitutively active androgen

receptor variant. These results suggest that AR-FL and constitutively active AR variants could act differently (Figure 3C). For example, DHT-stimulated AR-FL might recruit co-repressors and, in turn, represses N-cadherin expression. Besides, constitutively active AR variants lacking of carboxy-terminal region might behave differently and induce N-cadherin expression. Furthermore, AR-FL and constitutively active AR variants could compete with each other for regulating N-cadherin expression. Consistent with this hypothesis, N-cadherin gene contains a cluster of androgen response elements (ARE) repeats in intron 1 [28].

However, constitutively active AR variants could also indirectly control N-cadherin expression. For example, in prostate cancer, N-cadherin expression was associated with a nuclear translocation of Twist1 [29]. Although our data showed no significant difference in TWIST1 mRNA levels, constitutively active AR variants might enhance nuclear translocation of Twist1, which could in turn induce N-cadherin expression after binding to the E-box within the first intron of N-cadherin.

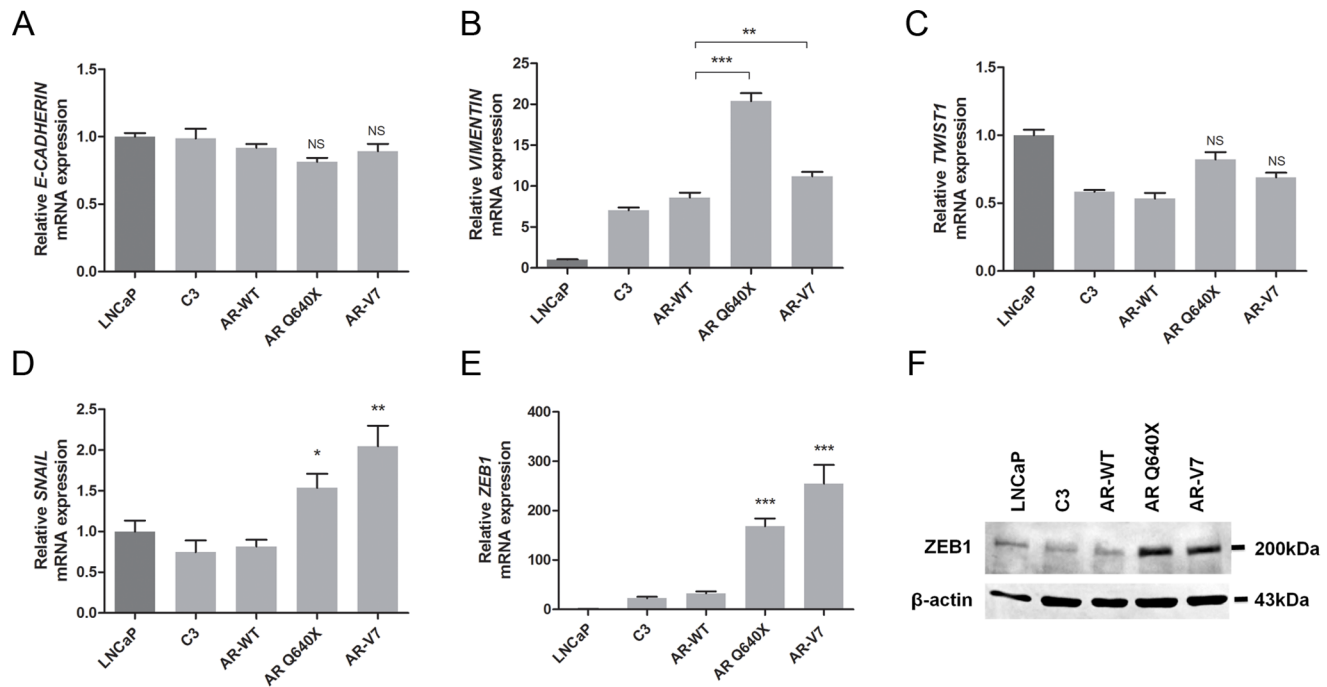

**Figure 4. Upregulation of mesenchymal markers by constitutively active androgen variants in prostate cancer cells.** LNCaP cells were transfected with the ARWT, ARQ640X or AR-V7 expression plasmid or the empty plasmid (C3). A). *E-CADHERIN*, B). *VIMENTIN*, C). *TWIST1*, D). *SNAIL* and E). *ZEB1* expression levels were analyzed by qRT-PCR at day-9 after transfection. For each sample, expression levels were normalized to *PBGD* or  $\beta$ -*ACTIN* and reported as relative value to LNCaP parental cell line. Values are presented as the mean of  $\Delta\Delta Ct \pm SEM$ . NS: Not Significant \*  $P < 0.05$ , \*\*  $P < 0.01$  and \*\*\*  $P < 0.001$ . F). Western Blot showing evolution of *ZEB1* expression in LNCaP cells overexpressing constitutively active AR variants. Immunoblot from 100  $\mu$ g of total protein extracts.  $\beta$ -actin was used as loading control. doi:10.1371/journal.pone.0063466.g004

These hypotheses deserve to be studied in further studies to understand how constitutively active AR variants regulate *N-CADHERIN* expression.

In this study, we have also shown that constitutively active AR variants were associated with an increased expression of mesenchymal markers as *VIMENTIN*, *SNAIL* and *ZEB1*. These results are consistent with a recent study, which showed an increase of mesenchymal markers in tumors from patients treated with androgen deprivation therapy [24]. Taken together, our findings suggest that constitutively active AR variants could be associated with EMT process. However, these markers are not consistently associated with EMT. For example, *SNAIL* confers resistance to apoptosis to tumor cells exposed to ionizing radiations and genotoxic drugs, and enables breast cells to become tumor-initiating cells [30,31,32,33,34].

The expression of mesenchymal markers reported here in the presence of constitutively active AR variants was not associated with a downregulation of *E-cadherin* in our model. The inverse correlation between *N-cadherin* upregulation and *E-cadherin* downregulation is still debated. Indeed, McKeithen and colleagues, and more recently Tiwari and colleagues report a co-expression of both *E-* and *N-cadherins* in tumor cells [35,36]. In these studies *E-cadherin* protein displays a different subcellular localization. Moreover, the reported *N-cadherin* upregulation after castration in LNCaP-19 cells is not accompanied by a decrease of *E-cadherin* expression in *in vitro* cell culture [22]. Nevertheless, the expected *E-cadherin* downregulation in this model is only observed in orthotopic tumors after castration, but not in subcutaneous LNCaP-19 tumors, suggesting an important role of the surrounding prostatic environment for *E-cadherin* downregulation [22]. Besides, an inverse correlation between

castration-induced *N-cadherin* expression and *E-cadherin* downregulation has been documented in LAPC9 and LuCaP35 subcutaneous xenografts models [23,24]. However, this cadherins switch has not been reported in two studies focusing on human clinical prostate tumors, from patients with or without androgen deprivation therapy [22,24].

Further studies are warranted to understand functional consequences of *N-cadherin* and other mesenchymal markers upregulation in the presence of constitutively active AR variants. *N-cadherin* expression is widely associated with tumor progression notably owing to its role in migration and invasion. Indeed, *N-cadherin* favors the migration of cancer cells via cytoskeleton reorganization and lamellipodia formation [14]. It also promotes the migration of cancer cells establishing homophilic interactions with neighboring tissues such as the stromal tissue or endothelium [37,38]. *N-cadherin* expression is also associated with survival in prostate cancer cells and melanoma cells. Indeed, *N-cadherin* expression can activate the phosphatidylinositol 3-kinase (PI3K)/AKT pathway to inactivate pro-apoptotic proteins and to induce an increase of anti-apoptotic proteins as Bcl-2 [39,40]. Finally, a recent study showed that *N-cadherin* could mediate angiogenesis by inducing monocyte chemoattractant protein-1 (MCP-1) expression via the PI3K/AKT pathway [41].

There is presently great interest in the mode of action of constitutively active AR variants in CRPC. In this study, we have shown for the first time that constitutively active AR variants induce *N-cadherin* expression and other mesenchymal markers in PCa. These findings support the hypothesis that these constitutively active AR variants could contribute to systemic dissemination of PCa cells, and reinforce the importance to target these AR variants in PCa.

## Supporting Information

**Figure S1 N-cadherin expression was upregulated in C4-2B cells in the presence of constitutively active AR variants.** N-cadherin expression was assessed by qRT-PCR in C4-2B cells overexpressing AR Q640X variant or transfected with empty plasmid (C3) 4 days after transfection. Parental C4-2B cells were used as control. *N-CADHERIN* expression was normalized to  $\beta$ -ACTIN and calculated using the  $\Delta\Delta C_t$  method. Results are presented as the mean of  $\Delta\Delta C_t \pm$  SEM from three independent experiments. *NS: Not Significant \*  $P < 0.05$ , \*\* $P < 0.01$  and \*\*\* $P < 0.001$ .* (TIF)

**Figure S2 DHT activated AR-FL repressed N-cadherin expression induced by constitutively active AR variants.** 22Rv1 cells were cultured in complete medium supplemented with 100 nM and 1  $\mu$ M of MDV3100 or DMSO. N-cadherin

expression was analyzed by qRT-PCR four days after and was normalized to *PBGD*. The fold change was expressed as relative values to parental cell line 22Rv1 under normal condition. *NS: Not Significant \*  $P < 0.05$ , \*\* $P < 0.01$  and \*\*\* $P < 0.001$ .* (TIF)

## Acknowledgments

We would like to thank Claudine Ebel (IGBMC, Illkirch, France) for her technical assistance for cell sorting, and Pr. Etienne Weiss (ESBS, Illkirch, France) for cell imaging.

## Author Contributions

Conceived and designed the experiments: JC FC. Performed the experiments: FC IA EE. Analyzed the data: FC JC. Contributed reagents/materials/analysis tools: JEK JPB. Wrote the paper: FC JC.

## References

- Cunha GR, Ricke W, Thomson A, Marker PC, Risbridger G, et al. (2004) Hormonal, cellular, and molecular regulation of normal and neoplastic prostatic development. *J Steroid Biochem Mol Biol* 92: 221–236.
- Ceraline J, Cruchant MD, Erdmann E, Erbs P, Kurtz JE, et al. (2004) Constitutive activation of the androgen receptor by a point mutation in the hinge region: a new mechanism for androgen-independent growth in prostate cancer. *Int J Cancer* 108: 152–157.
- Lapouge G, Erdmann E, Marcias G, Jagla M, Monge A, et al. (2007) Unexpected paracrine action of prostate cancer cells harboring a new class of androgen receptor mutation – a new paradigm for cooperation among prostate tumor cells. *Int J Cancer* 121: 1238–1244.
- Marcias G, Erdmann E, Lapouge G, Siebert C, Barthelemy P, et al. (2010) Identification of novel truncated androgen receptor (AR) mutants including unreported pre-mRNA splicing variants in the 22Rv1 hormone-refractory prostate cancer (PCa) cell line. *Hum Mutat* 31: 74–80.
- Bergerat JP, Ceraline J (2009) Pleiotropic functional properties of androgen receptor mutants in prostate cancer. *Hum Mutat* 30: 145–157.
- Dehm SM, Schmidt LJ, Heemers HV, Vessella RL, Tindall DJ (2008) Splicing of a novel androgen receptor exon generates a constitutively active androgen receptor that mediates prostate cancer therapy resistance. *Cancer Res* 68: 5469–5477.
- Guo Z, Yang X, Sun F, Jiang R, Linn DE, et al. (2009) A novel androgen receptor splice variant is up-regulated during prostate cancer progression and promotes androgen depletion-resistant growth. *Cancer Res* 69: 2305–2313.
- Hornberg E, Ylitalo EB, Crnalic S, Antti H, Stattin P, et al. (2011) Expression of Androgen Receptor Splice Variants in Prostate Cancer Bone Metastases Is Associated with Castration-Resistance and Short Survival. *PLoS One* 6: e19059.
- Hu R, Dunn TA, Wei S, Isharwal S, Veltri RW, et al. (2009) Ligand-independent androgen receptor variants derived from splicing of cryptic exons signify hormone-refractory prostate cancer. *Cancer Res* 69: 16–22.
- Watson PA, Chen YF, Balbas MD, Wongvipat J, Succi ND, et al. (2010) Constitutively active androgen receptor splice variants expressed in castration-resistant prostate cancer require full-length androgen receptor. *Proc Natl Acad Sci U S A* 107: 16759–16765.
- Li Y, Chan SC, Brand LJ, Hwang TH, Silverstein KA, et al. (2013) Androgen receptor splice variants mediate enzalutamide resistance in castration-resistant prostate cancer cell lines. *Cancer Res* 73: 483–489.
- Mostaghel EA, Marck BT, Plymate SR, Vessella RL, Balk S, et al. (2011) Resistance to CYP17A1 inhibition with abiraterone in castration-resistant prostate cancer: induction of steroidogenesis and androgen receptor splice variants. *Clin Cancer Res* 17: 5913–5925.
- Lapouge G, Marcias G, Erdmann E, Kessler P, Cruchant M, et al. (2008) Specific properties of a C-terminal truncated androgen receptor detected in hormone refractory prostate cancer. *Adv Exp Med Biol* 617: 529–534.
- Derycke LD, Bracke ME (2004) N-cadherin in the spotlight of cell-cell adhesion, differentiation, embryogenesis, invasion and signalling. *Int J Dev Biol* 48: 463–476.
- Gumbiner BM (2005) Regulation of cadherin-mediated adhesion in morphogenesis. *Nat Rev Mol Cell Biol* 6: 622–634.
- Kalluri R (2009) EMT: when epithelial cells decide to become mesenchymal-like cells. *J Clin Invest* 119: 1417–1419.
- Polyak K, Weinberg RA (2009) Transitions between epithelial and mesenchymal states: acquisition of malignant and stem cell traits. *Nat Rev Cancer* 9: 265–273.
- Voulgari A, Pintzas A (2009) Epithelial-mesenchymal transition in cancer metastasis: mechanisms, markers and strategies to overcome drug resistance in the clinic. *Biochim Biophys Acta* 1796: 75–90.
- Tomita K, van Bokhoven A, van Leenders GJ, Ruijter ET, Jansen CF, et al. (2000) Cadherin switching in human prostate cancer progression. *Cancer Res* 60: 3650–3654.
- Clarke NW, Hart CA, Brown MD (2009) Molecular mechanisms of metastasis in prostate cancer. *Asian J Androl* 11: 57–67.
- Jin JK, Dayyani F, Gallick GE (2011) Steps in prostate cancer progression that lead to bone metastasis. *Int J Cancer* 128: 2545–2561.
- Jennbacken K, Tesan T, Wang W, Gustavsson H, Damber JE, et al. (2010) N-cadherin increases after androgen deprivation and is associated with metastasis in prostate cancer. *Endocr Relat Cancer* 17: 469–479.
- Tanaka H, Kono E, Tran CP, Miyazaki H, Yamashiro J, et al. (2010) Monoclonal antibody targeting of N-cadherin inhibits prostate cancer growth, metastasis and castration resistance. *Nat Med* 16: 1414–1420.
- Sun Y, Wang BE, Leong KG, Yue P, Li L, et al. (2012) Androgen deprivation causes epithelial-mesenchymal transition in the prostate: implications for androgen-deprivation therapy. *Cancer Res* 72: 527–536.
- Guyader C, Ceraline J, Gravier E, Morin A, Michel S, et al. (2012) Risk of hormone escape in a human prostate cancer model depends on therapy modalities and can be reduced by tyrosine kinase inhibitors. *PLoS One* 7: e42252.
- Gustavsson H, Welen K, Damber JE (2005) Transition of an androgen-dependent human prostate cancer cell line into an androgen-independent subline is associated with increased angiogenesis. *Prostate* 62: 364–373.
- Jennbacken K, Gustavsson H, Welen K, Vallbo C, Damber JE (2006) Prostate cancer progression into androgen independency is associated with alterations in cell adhesion and invasivity. *Prostate* 66: 1631–1640.
- Takayama K, Kaneshiro K, Tsutsumi S, Horie-Inoue K, Ikeda K, et al. (2007) Identification of novel androgen response genes in prostate cancer cells by coupling chromatin immunoprecipitation and genomic microarray analysis. *Oncogene* 26: 4453–4463.
- Alexander NR, Tran NL, Rekapally H, Summers CE, Glackin C, et al. (2006) N-cadherin gene expression in prostate carcinoma is modulated by integrin-dependent nuclear translocation of Twist1. *Cancer Res* 66: 3365–3369.
- de Herreros AG, Peiro S, Nassour M, Savagner P (2010) Snail family regulation and epithelial mesenchymal transitions in breast cancer progression. *J Mammary Gland Biol Neoplasia* 15: 135–147.
- Escriba M, Peiro S, Herranz N, Villagrasa P, Dave N, et al. (2008) Repression of PTEN phosphatase by Snail transcriptional factor during gamma radiation-induced apoptosis. *Mol Cell Biol* 28: 1528–1540.
- Kajita M, McClintock KN, Wade PA (2004) Aberrant expression of the transcription factors snail and slug alters the response to genotoxic stress. *Mol Cell Biol* 24: 7559–7566.
- Mani SA, Guo W, Liao MJ, Eaton EN, Ayyanan A, et al. (2008) The epithelial-mesenchymal transition generates cells with properties of stem cells. *Cell* 133: 704–715.
- Morel AP, Lievre M, Thomas C, Hinkal G, Ansieau S, et al. (2008) Generation of breast cancer stem cells through epithelial-mesenchymal transition. *PLoS One* 3: e2888.
- McKeithen D, Graham T, Chung LW, Odeiro-Marah V (2010) Snail transcription factor regulates neuroendocrine differentiation in LNCaP prostate cancer cells. *Prostate* 70: 982–992.
- Tiwari N, Meyer-Schaller N, Arnold P, Antoniadis H, Pachkov M, et al. (2013) Klf4 Is a Transcriptional Regulator of Genes Critical for EMT, Including Jnk1 (Mapk8). *PLoS One* 8: e57329.
- Berx G, van Roy F (2009) Involvement of members of the cadherin superfamily in cancer. *Cold Spring Harb Perspect Biol* 1: a003129.

38. Hazan RB, Phillips GR, Qiao RF, Norton L, Aaronson SA (2000) Exogenous expression of N-cadherin in breast cancer cells induces cell migration, invasion, and metastasis. *J Cell Biol* 148: 779–790.
39. Li G, Satyamoorthy K, Herlyn M (2001) N-cadherin-mediated intercellular interactions promote survival and migration of melanoma cells. *Cancer Res* 61: 3819–3825.
40. Tran NL, Adams DG, Vaillancourt RR, Heimark RL (2002) Signal transduction from N-cadherin increases Bcl-2. Regulation of the phosphatidylinositol 3-kinase/Akt pathway by homophilic adhesion and actin cytoskeletal organization. *J Biol Chem* 277: 32905–32914.
41. Nalla AK, Estes N, Patel J, Rao JS (2011) N-cadherin mediates angiogenesis by regulating monocyte chemoattractant protein-1 expression via PI3K/Akt signaling in prostate cancer cells. *Exp Cell Res* 317: 2512–2521.
